1 **Increased Burden of Familial-associated Early-onset Cancer Risk among Latino**  
2 **Americans Compared to non-Latino Whites.**

3

4 Qianxi Feng, MPH <sup>1</sup>, Eric Nickels, MD <sup>1,2</sup>, Ivo S. Muskens, MD <sup>1</sup>, Adam J. de Smith, PhD <sup>1</sup>, W.  
5 James Gauderman, PhD <sup>1</sup>, Amy C. Yee, MPH <sup>1</sup>, Charite Ricker, MS, CGC <sup>3</sup>, Thomas Mack, MD  
6 <sup>1</sup>, Andrew D. Leavitt, MD <sup>4</sup>, Lucy A. Godley, MD, PhD <sup>5</sup>, Joseph L. Wiemels, PhD <sup>1</sup>

7

8 Affiliations of authors:

9 <sup>1</sup> Department of Preventive Medicine, USC Keck School of Medicine, Los Angeles, CA

10 <sup>2</sup> Children's Hospital Los Angeles, Los Angeles, CA

11 <sup>3</sup> Norris Comprehensive Cancer Center, USC Keck School of Medicine, Los Angeles, CA

12 <sup>4</sup> Departments of Medicine and Laboratory Medicine, University of California, San Francisco,

13 San Francisco, CA

14 <sup>5</sup> Departments of Medicine and Human Genetics, The University of Chicago, Chicago, IL

15

16 Correspondence to:

17 Joseph L. Wiemels

18 Professor, Department of Preventive Medicine

19 Center for Genetic Epidemiology

20 1450 Biggy Street, NRT-1506

21 Los Angeles, CA 90089

22 (323) 442-7865

23 [wiemels@usc.edu](mailto:wiemels@usc.edu)

24

25

26

27 **Abstract**

28 The role of race/ethnicity in genetic predisposition of early-onset cancers can be estimated by  
29 comparing family-based cancer concordance rates among ethnic groups. We used linked  
30 California health registries to evaluate the relative cancer risks for first degree relatives of  
31 patients diagnosed between ages 0-26, and the relative risks of developing distinct second  
32 malignancies (SPMs). From 1989-2015, we identified 29,631 cancer patients and 62,863  
33 healthy family members. Given probands with cancer, there were increased relative risks of any  
34 cancer for siblings and mothers [standardized incidence ratio (SIR)=3.32;95% confidence  
35 interval (CI):2.54-4.35; $P<0.001$ ]and of SPMs (SIR=7.12;95%CI:5.46-9.28; $P<0.001$ ). Higher  
36 relative risk of any cancer in siblings and mothers ( $P=0.001$ ) was observed for Latinos  
37 (SIR=3.36;95%CI:2.24-5.05) compared to non-Latino White subjects (SIR=2.60;95%CI:1.66-  
38 4.06). Latinos had higher relative risks in first degree relatives and higher SPM risk compared to  
39 non-Latino Whites for most cancers, supporting a need for increased attention to the genetics of  
40 early-onset cancer predisposition in Latinos.

41 (150 words)

42

43 **Keywords:** Early-onset cancer; Familial risk; Linked cancer registry; Race/ethnicity; Latino  
44 Americans; Hispanic paradox.

45

46 **Key Messages**

- 47       • We identified 29 631 cancer patients and their 62 863 healthy family members in  
48       California from 1989 to 2015.
- 49       • The risk of early-onset cancer in siblings and mothers was elevated by having a proband  
50       with cancer in the same family.
- 51       • The majority of early-onset cancers exhibited higher relative risks in siblings and  
52       mothers and second primary malignancies for Latinos when compared to non-Latino  
53       Whites.

54

55

56

## 57 Introduction

58 Both genetic and environmental factors play a role in the causes of early-onset cancer. Several  
59 well-defined genetic syndromes contribute to early-onset cancer risk, along with a wider array of  
60 common alleles that influence risk marginally and detected at the population level. As an  
61 example of the former, Li-Fraumeni syndrome caused by mutations in the tumor suppressor  
62 gene *TP53*, is associated with an increased risk of a spectrum of cancers diagnosed at early  
63 ages<sup>1</sup>. An example of low penetrance common genetic variations associated with cancer risk  
64 include *IKZF1* and *ARID5B* genes in pediatric acute lymphoblastic leukemia (ALL)<sup>2</sup>. Both of  
65 these classes of variants may vary in frequency by race/ethnic group and cluster by families<sup>3-5</sup>,  
66 where familial germline deletion of *ETV6* was reported for ALL<sup>6</sup>. Examination of cancer  
67 predisposition requires investigation in ethnic strata particularly where cancer incidence rates  
68 are known to differ as it does for many pediatric cancer types, such as leukemia<sup>7</sup> and brain  
69 cancer<sup>8</sup>.

70  
71 In addition to primary cancers, incidence patterns of second independent malignancies may  
72 also provide a perspective of underlying genetic predisposition. Among childhood cancer  
73 survivors, more second primary malignancy cases are observed among non-Latino Whites  
74 (NLW) than Latino subjects<sup>9</sup>. This is also reflected in adult cancers, where Latino breast cancer  
75 survivors had lower risk of second cancers than NLW and NL Black women<sup>10</sup>.

76  
77 Germline pathogenic/likely pathogenic variants in cancer predisposition genes are found in  
78 approximately 10% of pediatric cancer patients<sup>1,11-13</sup>, and may be inherited or arise *de novo*.  
79 Highly penetrant inherited variants will contribute to clustering of cancer cases within the family.  
80 Shared environments within the family unit may also be considered alongside genetic risk as  
81 potential causes for family-based cancer concordance.

82

83 Familial concordance of a wide variety of cancers has been assessed using the Swedish  
84 Family-Cancer Database, leading to a deep understanding of familial relative risks<sup>14-16</sup>. The  
85 Victorian Paediatric Cancer Family Study in Australia also explored the cancer risks for relatives  
86 of children with cancer in a small population<sup>17</sup>. In the US, the Utah Population database may be  
87 the best-known population for studying familial risk<sup>18-22</sup>. Importantly, these studies largely  
88 comprise families of European ancestry, and therefore have not examined potential ethnic-  
89 specific familial risks. Here, we utilized linked population registries with over 64,000 individuals  
90 to quantify the familial risks (siblings and mothers) and the risks of early-onset second primary  
91 malignancies in the highly diverse and large population of California.

92

93

94

95 **Methods**

96 ***Source of Data***

97 We used linked population-based registries in California to evaluate the relative risks of early-  
98 onset cancers (0-26 years age of onset) for siblings and mothers of children, adolescents, and  
99 young adults (AYA) aged 0-26 diagnosed with cancer, as well as the relative risks of early-onset  
100 second primary malignancies (SPMs) among the proband patients. The dataset was created by  
101 linking information from the California Cancer Registry (CCR) and California Birth Statistical  
102 Master File, allowing the capture of siblings and parents of cancer probands, along with their  
103 cancer incidence. The linked dataset comprehensively encompassed all cancer cases 0-26  
104 years old, as well as their sibling and mother cancers, diagnosed from 1989 to 2015 in  
105 California. Our upper age limit of 26 was set based on the available age range covered by this  
106 relatively young cohort. Overall, the dataset included a total of 121 571 individuals. The  
107 information on healthy siblings and mothers was available during the whole study period,  
108 whereas the information on fathers was not available until 2004 in the birth files and therefore is  
109 not included in the current analysis.

110  
111 For the analysis of cancer familial risks, we included all primary incident cancer cases  
112 diagnosed from 1989 to 2015 among patients aged 0-26 years, with patient age-at-diagnosis  
113 limited by the study time period for which California maintained a statewide SEER gold-standard  
114 cancer registry. In addition, we performed a subgroup analysis on pediatric cancers including  
115 patients aged 0-15 years diagnosed within the same study period. For the analysis of secondary  
116 cancer risks, we included all SPMs diagnosed over the same years and patient age ranges.  
117 Although the CCR only records primary malignancies, some misclassification of relapsed or  
118 recurrent disease is possible. A physician (E.N.) reviewed diagnosis codes of all the cases  
119 diagnosed after the first primary case to prevent the misclassification of relapsed first primary  
120 malignancies (FPMs) as SPMs. For both analyses, we classified the cancers into twelve-broad

121 groups and subgroups as defined by the International Classification of Childhood Cancer, Third  
122 edition (ICCC-3, November 2012) (<https://seer.cancer.gov/iccc/iccc3.html>). The abbreviations  
123 for cancer types are included in **Table 1**. We also grouped the cancers into hematologic or solid  
124 categories in the analyses. Hematologic cancers were defined as leukemias and lymphomas.  
125 Solid cancers were defined as CNS tumors, neuroblastomas, retinoblastomas, renal tumors,  
126 hepatic tumors, bone tumors, sarcomas, germ cell tumors, epithelial neoplasms and other and  
127 unspecified malignant neoplasms.

128

### 129 **Statistical Analysis**

130 We quantified the relative risks for siblings and mothers, and the relative risks of SPMs by  
131 calculating the standardized incident ratios (SIRs) of a given cancer or of SPMs among the  
132 healthy siblings, and the SIRs of a given cancer among healthy mothers of probands using a  
133 previous published method<sup>14</sup>. We defined a proband as a pediatric or AYA patient with a given  
134 cancer. Only one child/AYA in each family can be a proband, so that in families with two or more  
135 cases, the proband is defined as the patient with the earliest date of diagnosis. Given a proband  
136 with cancer, we calculated the SIRs for a sibling or a mother in the same family for all types of  
137 cancers. Separately, we calculated the SIRs for a sibling for the same type of cancer as the  
138 proband. We also stratified the analyses by self-identified race/ethnicity of the mother in each  
139 family. The SIRs in siblings, mothers or of SPMs can be denoted as:

$$140 \quad SIR = \frac{O}{E} = \frac{\sum_{i=1}^N \sum_{j=1}^{n_i} D_{ij}}{\sum_{i=1}^N \sum_{j=1}^{n_i} \sum_{k=1}^{Kmax} \lambda_k t_{ijk}}$$

141 Where N is the number of families,  $n_i$  is the number of non-proband individuals of interest  
142 (siblings/SPMs/mothers) in family  $i$ , and  $Kmax$  is the total number of age intervals. The data for  
143 each individual includes a disease indicator ( $D_{ij}$ ) and the number of years “at risk” during the  $k^{\text{th}}$   
144 age interval ( $t_{ijk}$ ). A given individual is defined to be at risk beginning at their age when the  
145 proband in their family is diagnosed and ending either when they become affected themselves

146 or they are censored due to end of study follow-up. For siblings and mothers, age was stratified  
147 into seven groups as 0, 0-4, 5-9, 10-14, 15-19, 20-24 and 25-29 years. For the calculation of  
148 SIRs within a given race group,  $\lambda_k$  is the race-, sex- and age-specific incidence rate of a given  
149 cancer. We compared the SIRs across race/ethnic groups with approximate Chi-squared tests.  
150 The approximate chi-square method compares the probability of occurrence of events in one  
151 group to another, based on a binomial distribution. This comparison is not related to the 95%  
152 confidence intervals for the SIRs which are based on a Poisson distribution and may overlap  
153 between two groups that are significantly different by approximate chi-square comparison. We  
154 designated that all events occurred right at the middle point of each calendar year. We also  
155 stratified the analysis by 5-year age groups. The 95% confidence intervals (CIs) and p-values  
156 were calculated assuming a Poisson distribution. Statistical analyses were performed using R  
157 software (v 3.6.0). Any two-sided p-value less than 0.05 was considered statistically significant.  
158 A supplement is included with this manuscript with more information on the statistical tests and  
159 computational codes used. Please access this supplement "Statistics and coding supplement:  
160 Familial\_risk\_CCR\_eLife" for more information.

## 161 **Results**

### 163 ***Demographics of the study population***

164 From 1989 to 2015, we identified a total of 29 249 pediatric and AYA patients with a primary  
165 malignancy, comprising 29 072 probands, 112 affected siblings (from 110 families) and 65  
166 affected mothers. All siblings were diagnosed after the proband's diagnosis as defined, and 56  
167 (86.15%) of the 65 mothers were diagnosed after the proband's diagnosis. We also identified  
168 387 SPMs among all pediatric and AYA probands (**Table 2**).

169

### 170 ***Familial relative risks of early-onset cancers***



171 Overall, we found a 3.32-fold (95%CI:2.54-4.35) increased relative risk of any cancer among  
172 siblings and mothers who have a proband with cancer in the same family. Briefly, we found a  
173 2.97-fold (95%CI:1.96-4.50) increased relative risk of any cancer given a proband with  
174 hematologic cancers and a 4.54-fold (95%CI:3.19-6.45) increased relative risk of any cancer  
175 given a proband with solid cancers. When stratified by cancer types, with the exception of  
176 neuroblastomas, hepatic tumors, bone tumors, and malignant neoplasms, proband cancers  
177 siblings and mothers were found to have increased SIRs for any cancer (**Figure 1A**).

178

179 For the relative risk of specific cancer types, we found a 2.68-fold (95%CI:1.35-5.32) increased  
180 risk of hematologic cancers among siblings and mothers of a proband with hematologic cancer,  
181 and a 6.78-fold (95%CI:4.18-10.98) increased relative risk of solid cancers among siblings and  
182 mothers of a proband with solid cancer. Furthermore, CNS tumors and epithelial neoplasms  
183 exhibited statistically significantly increased relative risk for the same type of cancer as the  
184 proband [CNS, SIR=6.19; 95%CI:1.42-26.93; epithelial neoplasms, SIR=40.68; 95%CI: 3.17-  
185 521.78] (**Supplementary Table 1**). We also observed increased relative risks for sarcomas  
186 (SIR=7.36;95%CI:1.12-48.23) and epithelial neoplasms (SIR=5.37;95%CI:1.52-18.92) given a  
187 proband with leukemia, for epithelial neoplasms given a proband with CNS tumors  
188 (SIR=6.37;95%CI:1.33-30.41), and for leukemias given a proband with sarcomas  
189 (SIR=7.01;95%CI:1.12-43.92) (**Figure 2 & Supplementary Table 1**).

190

191 When stratified by more finely defined cancer subtypes, increased relative risks of any cancer  
192 for siblings and mothers were observed given a proband with lymphoid leukemia, acute myeloid  
193 leukemia, astrocytoma, certain gliomas, certain specified intracranial and intraspinal neoplasms,  
194 nephroblastoma and other nonepithelial renal tumors, rhabdomyosarcomas, certain specified  
195 soft tissue sarcomas, malignant gonadal germ cell tumors and certain unspecified carcinomas  
196 (**Supplementary Table 4**).

197

198 When stratified by race/ethnicity, the relative risk of any cancer for siblings and mothers given a  
199 proband with cancer was significantly higher among Latino subjects than non-Latino White  
200 (NLW) subjects [Latino: SIR=3.36;95%CI:2.24-5.05; NLW: SIR=2.60;95%CI:1.66-4.06;  
201  $P=0.001$ ]. Non-Latino Asians/Pacific Islanders (API) and Blacks also had higher SIRs than non-  
202 Latino Whites (SIR=4.58 and 9.96, respectively, Supplementary Table 2), but small numbers  
203 resulted in unstable estimates. Latino subjects also exhibited higher relative risks of any cancer  
204 than NLW subjects for solid cancers [Latino: SIR=4.98;95%CI:2.86-8.68; NLW:  
205 SIR=3.02;95%CI:1.72-5.28;  $P=0.001$ ], while NLW subjects exhibited higher relative risks than  
206 Latino subjects for hematologic cancers [Latino: SIR=2.48;95%CI:1.37-4.50; NLW:  
207 SIR=2.69;95%CI:1.29-5.62;  $P=0.016$ ] (**Figure 1B & Supplementary Table 2**). For the relative  
208 risk of specific cancers given a proband with the same cancer, Latino subjects showed higher  
209 relative risk of solid cancers than NLW subjects [Latino: SIR=7.94;95%CI:3.64-17.34; NLW:  
210 SIR=4.41;95%CI:2.10-9.23;  $P=0.005$ ] (**Supplementary Table 3**).

211

212 In the subgroup analysis of pediatric patients aged 0-15 years, we observed a similar trend  
213 where the relative risk of any cancer for siblings and mothers was significantly higher among  
214 Latino subjects than NLW subjects [Latino: SIR=1.51;95%CI:1.00-2.26; NLW:  
215 SIR=0.93;95%CI:0.60-1.46;  $P=0.003$ ] (**Supplementary Table 5**).

216

### 217 ***Relative risks of second primary malignancies***

218 Overall, we found a 7.12-fold increased risk of SPMs relative to the general population among  
219 children/AYAs with an FPM (SIR=7.12;95%CI:5.46-9.28). Most primary cancer types were  
220 associated with an elevated relative risk of SPMs (**Figure 3A**). When stratified by race/ethnicity,  
221 slightly higher relative risk of all SPMs given a proband with cancer was observed among Latino

222 subjects than NLW subjects [Latino: SIR=6.85;95%CI:4.56-10.30; NLW: SIR=6.67;95%CI:4.26-  
223 10.43;  $P=0.001$ ] (**Figure 3B**).

224

225 For the relative risks of SPMs of the same cancer types as the FPM, we found elevated risks for  
226 both hematologic and solid cancers. When stratified by race/ethnicity, higher relative risk of  
227 hematologic cancers was observed among NLW subjects compared to Latino subjects given a  
228 proband with hematologic cancers [Latino: SIR=4.23;95%CI:1.68-10.68; NLW:  
229 SIR=6.61;95%CI:1.80-24.29;  $P=0.012$ ] (**Supplementary Table 6**).

230

231 **Discussion**

232 To our knowledge, this is the first study to quantify the familial clustering risks and risks of SPMs  
233 among early-onset cancer patients with an emphasis on racial/ethnic differences. Using linked  
234 population registry data in the California population, we found that the risk for a sibling  
235 child/AYA or mother to have early-onset cancer was elevated once a proband was identified  
236 with an early-onset cancer. Likewise, the relative risks for SPMs were elevated among  
237 children/AYAs who contracted a first primary cancer. The findings were consistent across  
238 race/ethnic groups; however, the magnitude was different. Latinos had higher sibling/maternal  
239 relative risks as well as risks for SPMs compared to NLWs for most cancers.

240

241 Consistent with our results, a rich literature with a primary focus on European ancestry  
242 populations has reported excessive familial risks of hematologic malignancies<sup>14</sup>, lymphomas<sup>23-</sup>  
243 <sup>25</sup>, brain tumors<sup>26,27</sup>, neuroblastomas<sup>28</sup>, retinoblastomas<sup>25,28</sup>, germ cell tumors<sup>29</sup>, sarcomas<sup>30</sup> and  
244 melanomas<sup>31</sup>. In terms of secondary cancers, studies have reported excessive risks of second  
245 primary malignancies among survivors of hereditary retinoblastoma<sup>32</sup>, chronic myeloid  
246 leukemia<sup>33</sup>, chronic lymphocytic leukemia<sup>34</sup>, Hodgkin's lymphoma<sup>35</sup>, non-Hodgkin's  
247 lymphoma<sup>36</sup>, and neuroblastoma<sup>37</sup>. The excessive familial risks of certain cancers are highly  
248 likely to be associated with genetic predisposition. The archetypic examples are germline loss-  
249 of-function mutations in *RB1*, which are found in ~40% of retinoblastoma cases<sup>28</sup>, and adrenal  
250 cortical cancer, with germline *TP53* mutations accounting for most familial cases<sup>28</sup>. Low  
251 penetrance common genetic variations, for instance in *CEBPE*, *IKZF1*, and *ARID5B* genes in  
252 ALL, are associated with cancer risk and may also contribute to familial concordance as  
253 combinations of low frequency alleles or “polygenic risk scores” have been shown to be as  
254 impactful as single strong predisposition mutations in adult cancers<sup>38,39</sup>; however, their  
255 contribution to cancer clustering among children and their families has not yet been studied.

256

257 Our data demonstrate a higher degree of familial-based clustering among Latinos compared to  
258 non-Latino Whites. This familial concordance is likely due to both shared genetic and  
259 environmental causes and is accompanied by a clearly higher incidence of some cancer types.  
260 Latinos are an admixed population, comprising an ancestral mixture from Native American,  
261 European, and African sources. California Latinos, particularly the youth population are largely  
262 from Mexico, and harbor a higher risk of certain cancers particularly pediatric leukemias, the  
263 most common cancer in children<sup>40</sup>; however this higher risk is partially accounted for by a higher  
264 frequency of common risk alleles which do not address strong familial predisposition loci<sup>4</sup>. This  
265 higher risk identified in relation to the family unit has not been studied, and our results here beg  
266 for an analysis of comparative sources of genetic and environmental risk that contribute to the  
267 higher risk and familial clustering of cancers in Latinos.

268

269 Therapy of the first primary cancer is a major factor in the induction of secondary independent  
270 malignancies<sup>41-43</sup>. The purpose of radiation and chemo-therapies of cancer patients is to  
271 improve survivorship. In the current analysis, better survivorship of hematologic cancers for non-  
272 Latino Whites compared to Latinos may however contribute to the excessive risk of second  
273 primary malignancies among White subjects<sup>44</sup>, as some Latino subjects with hematologic  
274 cancers may not have survived long enough to develop a secondary cancer. Nevertheless,  
275 multiple primary cancer diagnoses are considered a key feature of hereditary cancer  
276 predisposition syndromes<sup>45</sup>. As such secondary cancers are rare, genetics are still likely to play  
277 a strong role<sup>46</sup>, and our overall SPM results here emphasize a similar ethnic-specific patterning  
278 as cancer clustering in first primary malignancies. Of note, our analysis was not designed to  
279 distinguish relative risk contributions from therapy and genetic sources for secondary cancers.

280

281 For some tumor types the germline predisposition was readily noted in this cohort, for example  
282 ten of the fourteen affected relatives who had a proband with retinoblastoma were diagnosed

283 with the same cancer, an unsurprising finding given that germline *RB1* mutations account for a  
284 significant proportion of retinoblastoma are highly penetrant and those tumors tend to be  
285 diagnosed young. We also observed increased relative risks for sarcomas given a proband with  
286 leukemias, suggesting the presence of families with Li-Fraumeni syndrome, which is  
287 characterized by a spectrum of childhood and adult-onset cancers including adrenocortical  
288 carcinoma, breast cancer, CNS tumors, sarcomas, and leukemia<sup>45</sup>.

289  
290 Population-level selection pressures are thought to influence the relative frequencies of alleles.  
291 For instance, genetic adaptations that shaped the Native American genome to cold and warm  
292 environments<sup>47</sup>, and immune response following colonization by Europeans<sup>48</sup>. Our result  
293 suggests that some adaptive selection pressures, or simply genetic drift exacerbated by  
294 bottlenecking of genetic diversity during the Native American population history may  
295 differentially influence familial cancer clustering by age of cancer onset<sup>49</sup>. If replicated in other  
296 study settings, this contrast between genetic risk child and adult onset cancers by ethnicity  
297 should be studied further for a fuller understanding of familial risks.

298  
299 Our analyses capitalized on the highly diverse population in California, allowing us to quantify  
300 the relative risks across different ethnic groups. Moreover, the utilization of linked population-  
301 based registries in California enabled us to minimize the selection and information biases  
302 introduced by a case-control study design or other strategies that only sample portions of the  
303 population. Furthermore, although Latinos usually have more people per household than  
304 NLWs<sup>50</sup>, detection bias of cancers among siblings and mothers is less likely, which is reflected  
305 by the excessive relative risk of lymphomas among NLW compared to Latino subjects in the  
306 current analysis in agreement with previous reports<sup>51,52</sup>. There are also some limitations of our  
307 study. Despite the large number of total cancer cases, the number of affected siblings and  
308 second primaries are very small for some cancer types, thus limiting the power to detect

309 significant relative risks. Also, we are unable to track cancer incidence for affected siblings,  
310 maternal cancers, and SPMs that may have been diagnosed outside of California. In addition,  
311 the follow-up time of 26 years is not enough for a comprehensive detection of SPMs in the  
312 probands, nor for cancers arising in proband mothers at older ages. These insufficient follow-up  
313 time and loss-to follow-up issues have limited our ability to quantify the relative risks among  
314 mothers with cancer onset at older ages (>40 yrs). Lastly, the lack of records on fathers reduces  
315 our ability to quantify the relative risks among other first-degree relatives and may reduce the  
316 appreciation of the potential contribution of high-risk cancer predisposition syndromes which can  
317 be inherited from either parent.

318

319 Accepting those limitations with the current dataset, our study has several important implications  
320 that may open windows to future research. First, the genetic predispositions driving the  
321 excessive childhood cancer risks among the Latino population, whether from higher frequencies  
322 of known cancer predisposition syndromes or mutations in novel genes, or a higher burden of  
323 common or rare genetic risk alleles, warrants further investigation. Second, the comparative  
324 attributable fraction of familial risk based on environmental risk factors interacting with genetic  
325 predispositions warrants further investigation. Lastly, descriptive studies on familial and  
326 secondary cancer risks among race/ethnic groups other than Latinos and non-Latino Whites  
327 may provide additional insights into cancer incidence variation by race/ethnicity.

328

329 (2939 words)

330 **Funding**

331 This work was supported by the V Foundation for funding this work (Grant FP067172). The  
332 collection of cancer incidence data used in this study was supported by the California  
333 Department of Public Health as part of the statewide cancer reporting program mandated by  
334 California Health and Safety Code Section 103885; the National Cancer Institute's Surveillance,  
335 Epidemiology, and End Results Program under contract HHSN261201000140C awarded to the  
336 Cancer Prevention Institute of California, contract HHSN261201000035C awarded to the  
337 University of Southern California, and contract HHSN261201000034C awarded to the Public  
338 Health Institute; and the Centers for Disease Control and Prevention's National Program of  
339 Cancer Registries, under agreement U58DP003862-01 awarded to the California Department of  
340 Public Health. The ideas and opinions expressed herein are those of the author(s), and no  
341 endorsement by the California Department of Public Health, the National Cancer Institute, or the  
342 Centers for Disease Control and Prevention or their contractors and subcontractors is intended  
343 or should be inferred.

344

345 **Declaration of interests**

346 None.



## 347 References

- 348 1. Saletta F, Dalla Pozza L, Byrne JA. Genetic causes of cancer predisposition in children  
349 and adolescents. *Transl Pediatr.* 2015;4(2):67-75.
- 350 2. Moriyama T, Relling MV, Yang JJ. Inherited genetic variation in childhood acute  
351 lymphoblastic leukemia. *Blood.* 2015;125(26):3988-3995.
- 352 3. Caswell-Jin JL, Gupta T, Hall E, et al. Racial/ethnic differences in multiple-gene  
353 sequencing results for hereditary cancer risk. *Genet Med.* 2018;20(2):234-239.
- 354 4. Walsh KM, Chokkalingam AP, Hsu LI, et al. Associations between genome-wide Native  
355 American ancestry, known risk alleles and B-cell ALL risk in Hispanic children.  
356 *Leukemia.* 2013;27(12):2416-2419.
- 357 5. Ricker C, Culver JO, Lowstuter K, et al. Increased yield of actionable mutations using  
358 multi-gene panels to assess hereditary cancer susceptibility in an ethnically diverse  
359 clinical cohort. *Cancer Genet.* 2016;209(4):130-137.
- 360 6. Rampersaud E, Ziegler DS, Iacobucci I, et al. Germline deletion of ETV6 in familial acute  
361 lymphoblastic leukemia. *Blood Adv.* 2019;3(7):1039-1046.
- 362 7. Feng Q, de Smith AJ, Vergara-Lluri M, et al. Trends in Acute Lymphoblastic Leukemia  
363 Incidence in the US from 2000-2016: an Increased Risk in Latinos Across All Age  
364 Groups. In. *Am J Epidemiol.* Vol In press2020.
- 365 8. Ostrom QT, Adel Fahmideh M, Cote DJ, et al. Risk factors for childhood and adult  
366 primary brain tumors. *Neuro Oncol.* 2019;21(11):1357-1375.
- 367 9. Brown AL, Arroyo VM, Agrusa JE, Scheurer ME, Gramatges MM, Lupo PJ. Survival  
368 disparities for second primary malignancies diagnosed among childhood cancer  
369 survivors: A population-based assessment. *Cancer.* 2019;125(20):3623-3630.
- 370 10. Calip GS, Law EH, Ko NY. Racial and ethnic differences in risk of second primary  
371 cancers among breast cancer survivors. *Breast Cancer Res Treat.* 2015;151(3):687-696.
- 372 11. Zhang J, Walsh MF, Wu G, et al. Germline Mutations in Predisposition Genes in  
373 Pediatric Cancer. *N Engl J Med.* 2015;373(24):2336-2346.
- 374 12. Plon SE, Lupo PJ. Genetic Predisposition to Childhood Cancer in the Genomic Era.  
375 *Annu Rev Genomics Hum Genet.* 2019;20:241-263.
- 376 13. Ripperger T, Bielack SS, Borkhardt A, et al. Childhood cancer predisposition syndromes-  
377 A concise review and recommendations by the Cancer Predisposition Working Group of  
378 the Society for Pediatric Oncology and Hematology. *Am J Med Genet A.*  
379 2017;173(4):1017-1037.
- 380 14. Sud A, Chattopadhyay S, Thomsen H, et al. Analysis of 153 115 patients with  
381 hematological malignancies refines the spectrum of familial risk. *Blood.*  
382 2019;134(12):960-969.
- 383 15. Kharazmi E, Fallah M, Sundquist K, Hemminki K. Familial risk of early and late onset  
384 cancer: nationwide prospective cohort study. *BMJ.* 2012;345:e8076.
- 385 16. Hemminki K, Czene K. Attributable risks of familial cancer from the Family-Cancer  
386 Database. *Cancer Epidemiol Biomarkers Prev.* 2002;11(12):1638-1644.
- 387 17. Heath JA, Smibert E, Algar EM, Dite GS, Hopper JL. Cancer risks for relatives of  
388 children with cancer. *J Cancer Epidemiol.* 2014;2014:806076.
- 389 18. Curtin K, Smith KR, Fraser A, Pimentel R, Kohlmann W, Schiffman JD. Familial risk of  
390 childhood cancer and tumors in the Li-Fraumeni spectrum in the Utah Population  
391 Database: implications for genetic evaluation in pediatric practice. *Int J Cancer.*  
392 2013;133(10):2444-2453.
- 393 19. Kohli DR, Smith KR, Wong J, et al. Familial pancreatic cancer risk: a population-based  
394 study in Utah. *J Gastroenterol.* 2019;54(12):1106-1112.

- 395 20. Samadder NJ, Curtin K, Wong J, et al. Epidemiology and familial risk of synchronous  
396 and metachronous colorectal cancer: a population-based study in Utah. *Clin*  
397 *Gastroenterol Hepatol*. 2014;12(12):2078-2084 e2071-2072.
- 398 21. Wang X, Harmon J, Zabrieskie N, et al. Using the Utah Population Database to assess  
399 familial risk of primary open angle glaucoma. *Vision Res*. 2010;50(23):2391-2395.
- 400 22. Goldgar DE, Easton DF, Cannon-Albright LA, Skolnick MH. Systematic population-  
401 based assessment of cancer risk in first-degree relatives of cancer probands. *J Natl*  
402 *Cancer Inst*. 1994;86(21):1600-1608.
- 403 23. Cerhan JR, Slager SL. Familial predisposition and genetic risk factors for lymphoma.  
404 *Blood*. 2015;126(20):2265-2273.
- 405 24. Fallah M, Kharazmi E, Pukkala E, et al. Familial risk of non-Hodgkin lymphoma by sex,  
406 relationship, age at diagnosis and histology: a joint study from five Nordic countries.  
407 *Leukemia*. 2016;30(2):373-378.
- 408 25. Madanat-Harjuoja LM, Pitkaniemi J, Hirvonen E, Malila N, Diller LR. Linking population-  
409 based registries to identify familial cancer risk in childhood cancer. *Cancer*.  
410 2020;126(13):3076-3083.
- 411 26. Couldwell WT, Cannon-Albright LA. A description of familial clustering of meningiomas in  
412 the Utah population. *Neuro Oncol*. 2017;19(12):1683-1687.
- 413 27. Crump C, Sundquist J, Sieh W, Winkleby MA, Sundquist K. Perinatal and familial risk  
414 factors for brain tumors in childhood through young adulthood. *Cancer Res*.  
415 2015;75(3):576-583.
- 416 28. Kamihara J, Bourdeaut F, Foulkes WD, et al. Retinoblastoma and Neuroblastoma  
417 Predisposition and Surveillance. *Clin Cancer Res*. 2017;23(13):e98-e106.
- 418 29. Landero-Huerta DA, Viguera-Villasenor RM, Yokoyama-Rebollar E, et al. Epigenetic  
419 and risk factors of testicular germ cell tumors: a brief review. *Front Biosci (Landmark*  
420 *Ed)*. 2017;22:1073-1098.
- 421 30. Lynch HT, Deters CA, Hogg D, Lynch JF, Kinarsky Y, Gatalica Z. Familial sarcoma:  
422 challenging pedigrees. *Cancer*. 2003;98(9):1947-1957.
- 423 31. Frank C, Sundquist J, Hemminki A, Hemminki K. Risk of other Cancers in Families with  
424 Melanoma: Novel Familial Links. *Sci Rep*. 2017;7:42601.
- 425 32. Marees T, Moll AC, Imhof SM, de Boer MR, Ringens PJ, van Leeuwen FE. Risk of  
426 second malignancies in survivors of retinoblastoma: more than 40 years of follow-up. *J*  
427 *Natl Cancer Inst*. 2008;100(24):1771-1779.
- 428 33. Sasaki K, Kantarjian HM, O'Brien S, et al. Incidence of second malignancies in patients  
429 with chronic myeloid leukemia in the era of tyrosine kinase inhibitors. *Int J Hematol*.  
430 2019;109(5):545-552.
- 431 34. Molica S. Second neoplasms in chronic lymphocytic leukemia: incidence and  
432 pathogenesis with emphasis on the role of different therapies. *Leuk Lymphoma*.  
433 2005;46(1):49-54.
- 434 35. Baker H. Second cancer risk for Hodgkin's lymphoma survivors. *Lancet Oncol*.  
435 2016;17(2):e50.
- 436 36. Chattopadhyay S, Sud A, Zheng G, et al. Second primary cancers in non-Hodgkin  
437 lymphoma: Bidirectional analyses suggesting role for immune dysfunction. *Int J Cancer*.  
438 2018;143(10):2449-2457.
- 439 37. Applebaum MA, Henderson TO, Lee SM, Pinto N, Volchenbom SL, Cohn SL. Second  
440 malignancies in patients with neuroblastoma: the effects of risk-based therapy. *Pediatr*  
441 *Blood Cancer*. 2015;62(1):128-133.
- 442 38. Fantus RJ, Helfand BT. Germline Genetics of Prostate Cancer: Time to Incorporate  
443 Genetics into Early Detection Tools. *Clin Chem*. 2019;65(1):74-79.
- 444 39. Yadav S, Couch FJ. Germline Genetic Testing for Breast Cancer Risk: The Past,  
445 Present, and Future. *Am Soc Clin Oncol Educ Book*. 2019;39:61-74.

- 446 40. Barrington-Trimis JL, Cockburn M, Metayer C, Gauderman WJ, Wiemels J, McKean-  
447 Cowdin R. Trends in childhood leukemia incidence over two decades from 1992 to 2013.  
448 *Int J Cancer*. 2017;140(5):1000-1008.
- 449 41. McEnerney ME, Godley LA, Le Beau MM. Therapy-related myeloid neoplasms: when  
450 genetics and environment collide. *Nat Rev Cancer*. 2017;17(9):513-527.
- 451 42. Mazonakis M, Kachris S, Damilakis J. Second Cancer Risk from Radiation Therapy for  
452 Common Solid Tumors Diagnosed in Reproductive-Aged Females. *Radiat Prot*  
453 *Dosimetry*. 2018;182(2):208-214.
- 454 43. Turcotte LM, Liu Q, Yasui Y, et al. Chemotherapy and Risk of Subsequent Malignant  
455 Neoplasms in the Childhood Cancer Survivor Study Cohort. *J Clin Oncol*.  
456 2019;37(34):3310-3319.
- 457 44. Kirtane K, Lee SJ. Racial and ethnic disparities in hematologic malignancies. *Blood*.  
458 2017;130(15):1699-1705.
- 459 45. Valdez JM, Nichols KE, Kesserwan C. Li-Fraumeni syndrome: a paradigm for the  
460 understanding of hereditary cancer predisposition. *Br J Haematol*. 2017;176(4):539-552.
- 461 46. Churpek JE, Marquez R, Neistadt B, et al. Inherited mutations in cancer susceptibility  
462 genes are common among survivors of breast cancer who develop therapy-related  
463 leukemia. *Cancer*. 2016;122(2):304-311.
- 464 47. Reynolds AW, Mata-Miguez J, Miro-Herrans A, et al. Comparing signals of natural  
465 selection between three Indigenous North American populations. *Proc Natl Acad Sci U S*  
466 *A*. 2019;116(19):9312-9317.
- 467 48. Lindo J, Huerta-Sanchez E, Nakagome S, et al. A time transect of exomes from a Native  
468 American population before and after European contact. *Nat Commun*. 2016;7:13175.
- 469 49. O'Fallon BD, Fehren-Schmitz L. Native Americans experienced a strong population  
470 bottleneck coincident with European contact. *Proc Natl Acad Sci U S A*.  
471 2011;108(51):20444-20448.
- 472 50. bureau USC. Historical Households Tables. [https://www.census.gov/data/tables/time-](https://www.census.gov/data/tables/time-series/demo/families/households.html)  
473 [series/demo/families/households.html](https://www.census.gov/data/tables/time-series/demo/families/households.html). Published 2019. Accessed.
- 474 51. Center PR. Latinos in California, Texas, New York, Florida and New Jersey.  
475 [https://www.pewresearch.org/hispanic/2004/03/19/latinos-in-california-texas-new-york-](https://www.pewresearch.org/hispanic/2004/03/19/latinos-in-california-texas-new-york-florida-and-new-jersey/)  
476 [florida-and-new-jersey/](https://www.pewresearch.org/hispanic/2004/03/19/latinos-in-california-texas-new-york-florida-and-new-jersey/). Published 2004. Accessed.
- 477 52. Adams SV, Newcomb PA, Shustov AR. Racial Patterns of Peripheral T-Cell Lymphoma  
478 Incidence and Survival in the United States. *J Clin Oncol*. 2016;34(9):963-971.  
479  
480

481 **Tables**

482 Table 1. Abbreviations of the twelve broad groups defined by the International Classification of  
483 Childhood Cancer, Third edition.

484

| <b>Abbreviation</b>     | <b>Definition</b> †                                                     |
|-------------------------|-------------------------------------------------------------------------|
| Leukemias               | I. Leukemias, myeloproliferative diseases, and myelodysplastic diseases |
| Lymphomas               | II. Lymphomas and reticuloendothelial neoplasms                         |
| CNS tumors              | III. CNS and miscellaneous intracranial and intraspinal neoplasms       |
| Neuroblastomas          | IV. Neuroblastoma and other peripheral nervous cell tumors              |
| Retinoblastoma          | V. Retinoblastoma                                                       |
| Renal tumors            | VI. Renal tumors                                                        |
| Hepatic tumors          | VII. Hepatic tumors                                                     |
| Bone tumors             | VIII. Malignant bone tumors                                             |
| Sarcomas                | IX. Soft tissue and other extraosseous sarcomas                         |
| GCT                     | X. Germ cell tumors, trophoblastic tumors, and neoplasms of gonads      |
| Epithelial<br>neoplasms | XI. Other malignant epithelial neoplasms and malignant melanomas        |
| Other                   | XII. Other and unspecified malignant neoplasms                          |

485 † Cancers were classified into groups as defined by the International Classification of Childhood  
486 Cancer, Third edition (ICCC-3, November 2012) (<https://seer.cancer.gov/iccc/iccc3.html>).

487

488

489 Table 2. Selected demographic characteristic of probands, affected siblings and second primary  
 490 malignancies among the early-onset cancer patients in the linked population-based registries in  
 491 California, 1989 to 2015.  
 492

|                                   | Overall *      | No. of probands | No. of affected siblings | No. (%)<br>No. of affected mothers | No. of second primaries † |
|-----------------------------------|----------------|-----------------|--------------------------|------------------------------------|---------------------------|
| Overall                           | 29 249         | 29 072          | 112                      | 65                                 | 387                       |
| Age at diagnosis (years) ‡        |                |                 |                          |                                    |                           |
| 0                                 | 2592 (8.75)    | 2611 (8.98)     | 10 (8.93)                | 0 (0.00)                           | 4 (1.03)                  |
| 1-4                               | 8683 (29.3)    | 8719 (29.99)    | 15 (13.39)               | 2 (3.08)                           | 37 (9.56)                 |
| 5-9                               | 5054 (17.06)   | 5057 (17.39)    | 12 (10.71)               | 0 (0.00)                           | 67 (17.31)                |
| 10-14                             | 4224 (14.26)   | 4180 (14.38)    | 22 (19.64)               | 0 (0.00)                           | 98 (25.32)                |
| 15-19                             | 4734 (15.98)   | 4664 (16.04)    | 37 (33.04)               | 7 (10.77)                          | 90 (23.26)                |
| 20+                               | 4344 (14.66)   | 3841 (13.21)    | 16 (14.29)               | 56 (86.15)                         | 91 (23.51)                |
| Gender                            |                |                 |                          |                                    |                           |
| Male                              | 15 528 (52.40) | 15 467 (53.20)  | 56 (50.00)               | NA                                 | 198 (51.16)               |
| Female                            | 14 102 (47.59) | 13 605 (46.80)  | 56 (50.00)               | 65 (100.00)                        | 189 (48.84)               |
| Race/ethnicity                    |                |                 |                          |                                    |                           |
| Latino (all races)                | 13 281 (44.82) | 13 059 (44.92)  | 51 (45.54)               | 26 (40.00)                         | 159 (41.09)               |
| Non-Latino White                  | 11 410 (38.51) | 11 193 (38.50)  | 39 (34.82)               | 17 (26.15)                         | 128 (33.07)               |
| Non-Latino Black                  | 1772 (5.98)    | 1716 (5.90)     | 9 (8.04)                 | 7 (10.77)                          | 10 (2.58)                 |
| Non-Latino Asian/Pacific Islander | 2605 (8.79)    | 2551 (8.77)     | 12 (10.71)               | 0 (0.00)                           | 47 (12.14)                |
| Other                             | 563 (1.94)     | 553 (1.90)      | 1 (0.89)                 | 15 (4.62)                          | 43 (11.11)                |

493 \* All early-onset cancer patients diagnosed from 1989 to 2015 identified in the linked population-  
 494 based registries in California.

495 † Number of second primary malignancies diagnosed from 1989 to 2015 within all children  
 496 (probands and affected siblings, excluding mothers) with early-onset cancers in the linked  
 497 population-based registries in California.

498  
 499

500 **Figures**

501

502 **Figure legend:**

503

504 **Figure 1: Relative risks of early-onset cancers among siblings and mothers.**

505 A. Relative risks among siblings and mothers of any early-onset cancer (diagnosed under 26  
506 years of age) given a proband with cancer, 1989 to 2015, California, USA.

507 B. Relative risks by ethnic group among siblings and mothers of any early-onset cancer  
508 (diagnosed under 26 years of age) given a proband with cancer, 1989 to 2015, California, USA.

509

510 Cancers were classified into groups as defined by the International Classification of Childhood  
511 Cancer, Third edition (ICCC-3, November 2012) (<https://seer.cancer.gov/iccc/iccc3.html>).

512 Hematologic cancers include leukemias and lymphomas. Solid cancers include CNS tumors,  
513 neuroblastomas, retinoblastomas, renal tumors, hepatic tumors, bone tumors, sarcomas, GCT,  
514 epithelial neoplasms and others.

515

516 The axis for SIR was natural log-transformed. SIR and 95% CI were not calculatable for cancers  
517 with zero observed case.

518 *P* was calculated assuming a Poisson distribution.

519 Abbreviations: SIR, Standardized incidence ratio. CI, confidence interval. GCT, germ cell  
520 tumors, trophoblastic tumors, and neoplasms of gonads.

521

522 **Figure 2: Relative risks of siblings and mothers of specific cancers.**

523 Cancers were classified into groups as defined by the International Classification of Childhood  
524 Cancer, Third edition (ICCC-3, November 2012) (<https://seer.cancer.gov/iccc/iccc3.html>).

525 Standardized incidence ratios greater than 10 were recoded to 10.

526 Siblings and mothers of a proband were diagnosed with cancer from 1989 to 2015 at 0 to 26  
527 years of age.

528 *P* was calculated assuming a Poisson distribution.

529 Abbreviations: SIR, Standardized incidence ratio. CI, confidence interval. GCT, germ cell  
530 tumors, trophoblastic tumors, and neoplasms of gonads.

531

532 **Figure 3. Relative risks of second primary malignancies.**

533 A. Relative risks of second primary malignancies of any early-onset cancer (diagnosed under 26  
534 years of age) given a proband with cancer, 1989 to 2015, California, USA.

535 B. Relative risks of second primary malignancies of any early-onset cancer (diagnosed under 26  
536 years of age) given a proband with cancer by ethnic group, 1989 to 2015, California, USA.

537

538 Cancers were classified into groups as defined by the International Classification of Childhood  
539 Cancer, Third edition (ICCC-3, November 2012) (<https://seer.cancer.gov/iccc/iccc3.html>).

540 Hematologic cancers include leukemias and lymphomas. Solid cancers include CNS tumors,  
541 neuroblastomas, retinoblastomas, renal tumors, hepatic tumors, bone tumors, sarcomas, GCT,  
542 epithelial neoplasms and others.

543

544 The axis for SIR was natural log-transformed. SIR and 95% CI were not calculatable for cancers  
545 with zero observed case.

546 *P* was calculated assuming a Poisson distribution.

547 Abbreviations: SIR, Standardized incidence ratio. CI, confidence interval. GCT, germ cell  
548 tumors, trophoblastic tumors, and neoplasms of gonads. FPM, first primary malignancy. SPM,  
549 second primary malignancy.

550

551  
552  
553 Figure 1A.

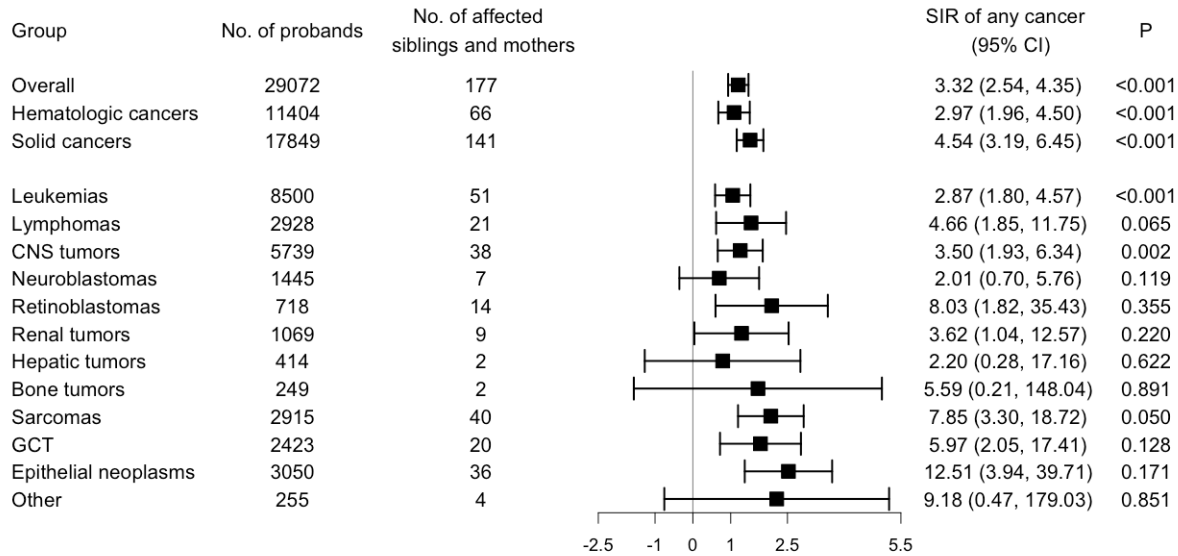

554  
555 Figure 1B.  
556

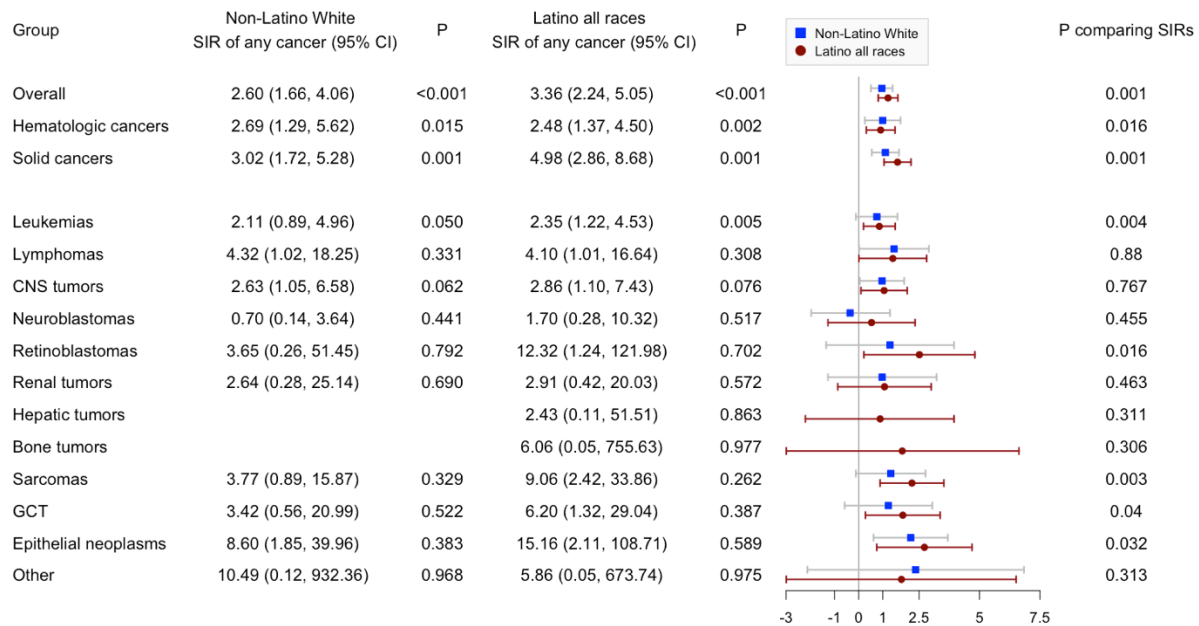

557  
558  
559  
560  
561  
562  
563  
564

565 Figure 2.

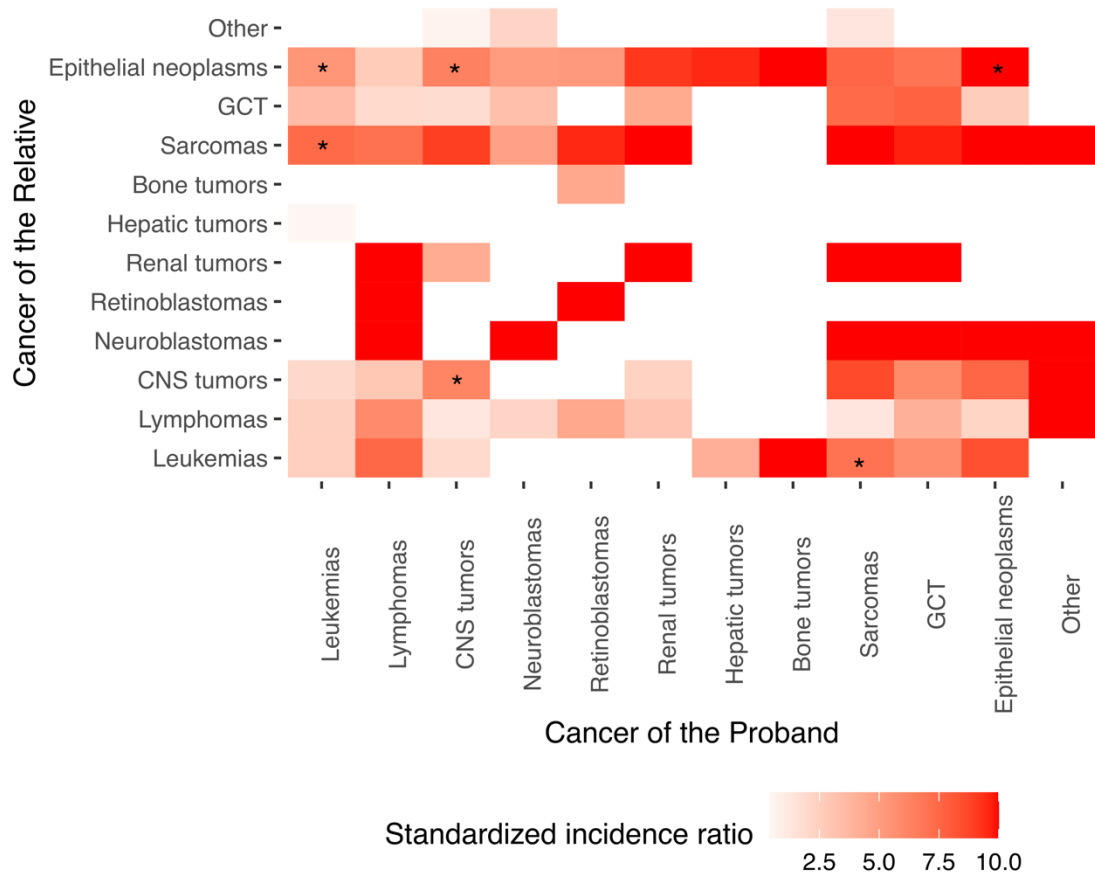

566  
567  
568



569 Figure 3A.

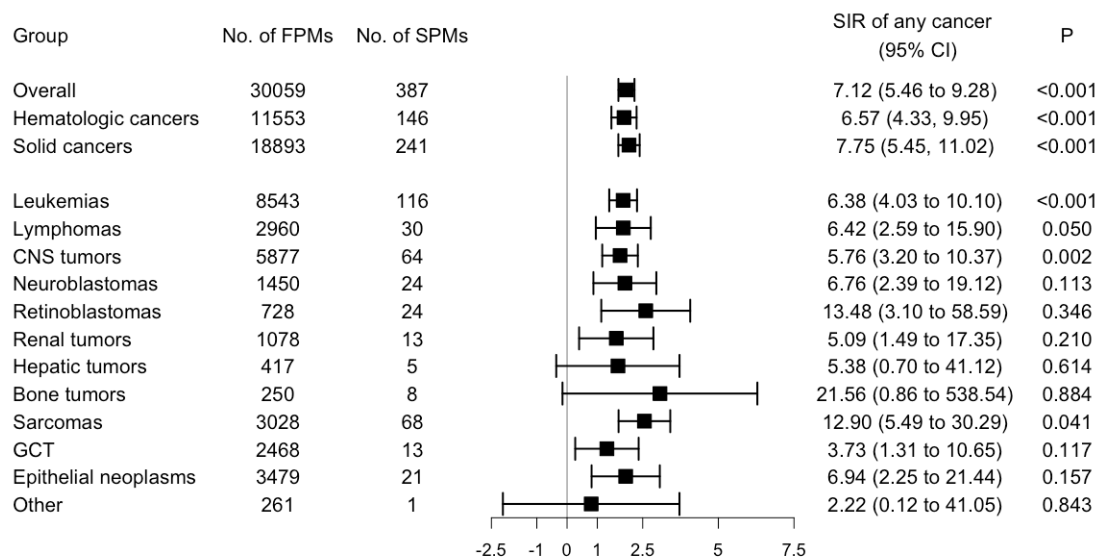

570  
571  
572

Figure 3B.

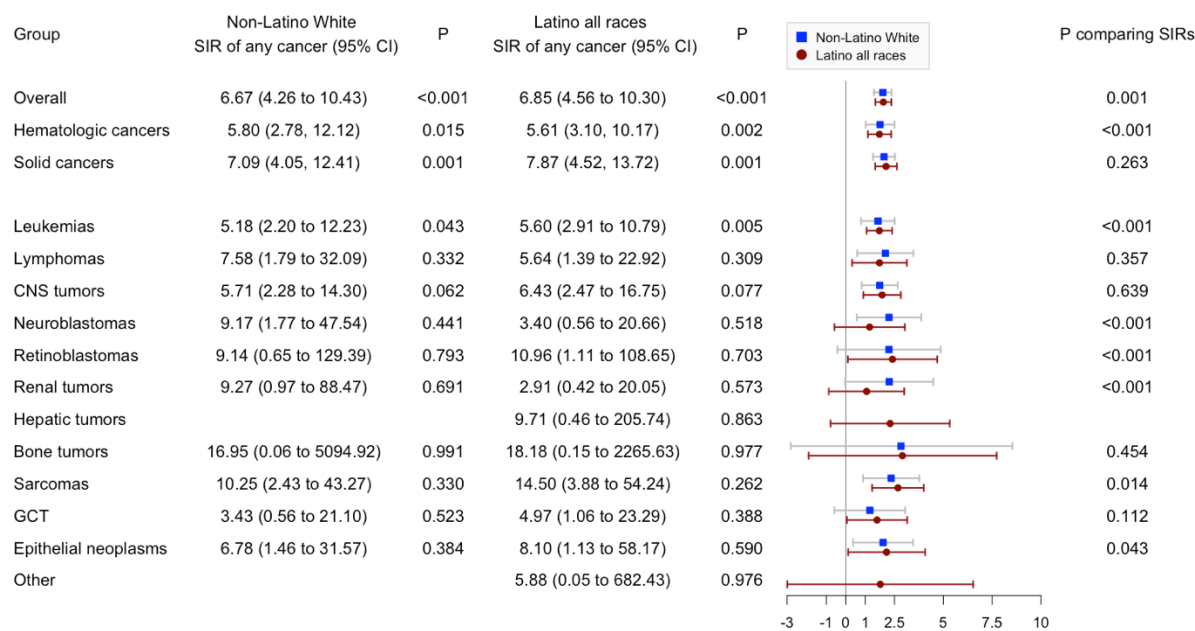

573  
574  
575  
576  
577  
578  
579  
580  
581
