# Supplementary material for: Increased Burden of Familial-associated Early-onset Cancer Risk among Minority Americans Compared to non-Latino Whites
Source: bioRxiv or medRxiv preprint supplement (doi:10.1101/2020.12.11.20247866), 2021-05-10

Supplemental materials

Supplemental Table 1. Relative risks of siblings and mothers for a specific type of early-onset cancer (diagnosed 0 to 26 years of age) given a proband with cancer, 1989 to 2015, California, USA.

| Cancer of the proband <sup>†</sup> | Cancer of the relative <sup>§</sup> | No. of affected relatives <sup>§</sup> | SIR (95% CI)               |
|------------------------------------|-------------------------------------|----------------------------------------|----------------------------|
|                                    | Leukemias                           | 11                                     | 2.48 (0.98, 6.31)          |
|                                    | Lymphomas                           | 6                                      | 2.46 (0.7, 8.61)           |
|                                    | CNS tumors                          | 6                                      | 2.02 (0.65, 6.3)           |
|                                    | VII. Hepatic tumors                 | 1                                      | 0.41 (0.12, 1.43)          |
|                                    | Sarcomas                            | 8                                      | <b>7.36* (1.12, 48.23)</b> |
|                                    | GCT                                 | 6                                      | 3.51 (0.78, 15.72)         |
| <b>Leukemias</b>                   | Epithelial neoplasms                | 13                                     | <b>5.37* (1.52, 18.92)</b> |
|                                    | Leukemias                           | 7                                      | 7.47 (0.99, 56.59)         |
|                                    | Lymphomas                           | 4                                      | 5.9 (0.55, 63.77)          |
|                                    | CNS tumors                          | 2                                      | 2.89 (0.27, 30.59)         |
|                                    | Neuroblastoma                       | 1                                      | 15.38 (0.01, 33561.02)     |
|                                    | Retinoblastoma                      | 1                                      | 40 (0, 9674536.43)         |
|                                    | Renal tumors                        | 1                                      | 12.99 (0.01, 15173.41)     |
|                                    | Sarcomas                            | 2                                      | 7.07 (0.18, 281.41)        |
|                                    | GCT                                 | 1                                      | 1.93 (0.13, 29.54)         |
| <b>Lymphomas</b>                   | Epithelial neoplasms                | 2                                      | 2.67 (0.28, 25.71)         |
|                                    | Leukemias                           | 5                                      | 1.94 (0.57, 6.58)          |
|                                    | Lymphomas                           | 2                                      | 1.31 (0.27, 6.36)          |
|                                    | CNS tumors                          | 11                                     | <b>6.19* (1.42, 26.93)</b> |
|                                    | Renal tumors                        | 1                                      | 4.29 (0.07, 248.94)        |
|                                    | Sarcomas                            | 6                                      | 8.97 (0.82, 98.5)          |
|                                    | GCT                                 | 2                                      | 1.81 (0.28, 11.72)         |
| <b>CNS tumors</b>                  | Epithelial neoplasms                | 10                                     | <b>6.37* (1.33, 30.41)</b> |

|                                    |                             |    |                            |
|------------------------------------|-----------------------------|----|----------------------------|
|                                    | Other                       | 1  | 0.65 (0.13, 3.18)          |
|                                    | Lymphomas                   | 1  | 2.23 (0.12, 41.5)          |
|                                    | Neuroblastoma               | 1  | 10.31 (0.02, 5575.99)      |
|                                    | Sarcomas                    | 1  | 4.78 (0.07, 348.18)        |
|                                    | GCT                         | 1  | 3.33 (0.09, 119.39)        |
|                                    | Epithelial neoplasms        | 2  | 5.09 (0.22, 116)           |
| <b>Neuroblastoma</b>               | Other                       | 1  | 2.23 (0.12, 41.5)          |
|                                    | Lymphomas                   | 1  | 4.5 (0.07, 288.57)         |
|                                    | Retinoblastoma              | 10 | 454.55 (0, 249162343.25)   |
|                                    | VIII. Malignant bone tumors | 1  | 4.5 (0.07, 288.57)         |
|                                    | Sarcomas                    | 1  | 9.52 (0.02, 4033.89)       |
| <b>Retinoblastoma</b>              | Epithelial neoplasms        | 1  | 5.24 (0.06, 464.17)        |
|                                    | Lymphomas                   | 1  | 3.02 (0.1, 91.14)          |
|                                    | CNS tumors                  | 1  | 2.37 (0.12, 48.42)         |
|                                    | Renal tumors                | 1  | 15.87 (0.01, 39083.18)     |
|                                    | Sarcomas                    | 2  | 13.33 (0.08, 2102.67)      |
|                                    | GCT                         | 1  | 4.42 (0.07, 273.17)        |
| <b>Renal tumors</b>                | Epithelial neoplasms        | 3  | 9.17 (0.3, 282.58)         |
|                                    | Leukemias                   | 1  | 4.08 (0.08, 214.07)        |
| <b>VII. Hepatic tumors</b>         | Epithelial neoplasms        | 1  | 9.52 (0.02, 4033.89)       |
|                                    | Leukemias                   | 1  | 14.49 (0.01, 25216.18)     |
| <b>VIII. Malignant bone tumors</b> | Epithelial neoplasms        | 1  | 16.39 (0.01, 45829.78)     |
|                                    | Leukemias                   | 8  | <b>7.01* (1.12, 43.92)</b> |
|                                    | Lymphomas                   | 1  | 1.37 (0.14, 13.5)          |
|                                    | CNS tumors                  | 7  | 8.62 (0.98, 75.89)         |
|                                    | Neuroblastoma               | 1  | 11.11 (0.02, 7640.96)      |
|                                    | Renal tumors                | 2  | 19.8 (0.04, 9443.54)       |
|                                    | Sarcomas                    | 10 | 31.45 (0.97, 1016.37)      |
| <b>Sarcomas</b>                    | GCT                         | 4  | 7.41 (0.51, 106.67)        |

|                             |                      |    |                              |
|-----------------------------|----------------------|----|------------------------------|
|                             | Epithelial neoplasms | 6  | 7.56 (0.84, 68.17)           |
|                             | Other                | 1  | 1.37 (0.14, 13.5)            |
|                             | Leukemias            | 4  | 5.81 (0.55, 61.76)           |
|                             | Lymphomas            | 2  | 4.06 (0.25, 66.15)           |
|                             | CNS tumors           | 3  | 5.93 (0.38, 93.24)           |
|                             | Neuroblastoma        | 1  | 19.23 (0, 103951.54)         |
|                             | Renal tumors         | 1  | 16.67 (0.01, 49765.5)        |
|                             | Sarcomas             | 2  | 9.66 (0.13, 717.76)          |
|                             | GCT                  | 3  | 7.71 (0.33, 178.63)          |
| <b>GCT</b>                  | Epithelial neoplasms | 4  | 6.92 (0.53, 91.15)           |
|                             | Leukemias            | 4  | 8.39 (0.49, 143.23)          |
|                             | Lymphomas            | 1  | 2.19 (0.12, 39.96)           |
|                             | CNS tumors           | 3  | 7.56 (0.34, 169.55)          |
|                             | Neuroblastoma        | 1  | 41.67 (0, 13012839.04)       |
|                             | Sarcomas             | 2  | 10.99 (0.11, 1087.03)        |
|                             | GCT                  | 1  | 2.63 (0.11, 63.25)           |
| <b>Epithelial neoplasms</b> | Epithelial neoplasms | 24 | <b>40.68* (3.17, 521.85)</b> |
|                             | Lymphomas            | 1  | 16.39 (0.01, 45829.78)       |
|                             | CNS tumors           | 1  | 14.29 (0.01, 23561.37)       |
|                             | Neuroblastoma        | 1  | 125 (0, 410967476948.84)     |
| <b>Other</b>                | Sarcomas             | 1  | 37.04 (0, 5610209.13)        |

† Cancers were classified into subgroups as defined by the International Classification of Childhood Cancer, Third edition (ICCC-3, November 2012) (<https://seer.cancer.gov/iccc/iccc3.html>).

§ Affected relatives include mother and siblings of the proband diagnosed with early-onset cancer under 26 years of age. SIR, Standardized incidence ratio. CI, confidence interval.

\* Statistically significant standardized incidence ratio with  $p < 0.05$  assuming a Poisson distribution.



|                                     |      |    |                                     |      |    |                                     |              |      |   |                                         |          |     |   |                                         |                  |
|-------------------------------------|------|----|-------------------------------------|------|----|-------------------------------------|--------------|------|---|-----------------------------------------|----------|-----|---|-----------------------------------------|------------------|
|                                     |      |    | (0.12,<br>932.36)                   |      |    |                                     |              | 8    | 0 | NA                                      | NA       | 19  | 0 | NA                                      | 0.065            |
| Hematologic<br>cancers <sup>†</sup> | 2702 | 19 | <b>2.69*</b><br><b>(1.29, 5.62)</b> | 5484 | 27 | <b>2.48*</b><br><b>(1.37, 4.50)</b> | <b>0.016</b> | 679  | 8 | <b>7.56* (1.12, &lt;0.00<br/>50.83)</b> | <b>1</b> | 391 | 4 | 6.15<br>(0.54,<br>69.81)                | <b>&lt;0.001</b> |
| Solid cancers <sup>†</sup>          | 5471 | 37 | <b>3.02*</b><br><b>(1.72, 5.28)</b> | 7323 | 62 | <b>4.98*</b><br><b>(2.86, 8.68)</b> | <b>0.001</b> | 1021 | 7 | 5.07 (0.96, <0.00<br>26.88)             | <b>1</b> | 719 | 9 | <b>7.35*</b><br><b>(1.25,<br/>43.2)</b> | <b>&lt;0.001</b> |

<sup>†</sup> Cancers were classified into subgroups as defined by the International Classification of Childhood Cancer, Third edition (ICCC-3, November 2012) (<https://seer.cancer.gov/iccc/iccc3.html>).

<sup>§</sup> Affected relatives include mother and siblings of the proband diagnosed with early-onset cancer under 26 years of age.

<sup>‡</sup> p-value comparing the SIRs between non-Latino White and Latino all races using an approximate Chi-squared test.

<sup>††</sup> Hematologic cancers include group 1, leukemias, myeloproliferative diseases, and myelodysplastic diseases; group 2, lymphomas and reticuloendothelial neoplasms. Solid cancers include I group 3, CNS and miscellaneous intracranial and intraspinal neoplasms; group 4, neuroblastoma and other peripheral nervous cell tumors; group 5, retinoblastoma; group 6, renal tumors; group 7, hepatic tumors; group 8, malignant bone tumors; group 9, soft tissue and other extraosseous sarcomas; group 10, germ cell tumors, trophoblastic tumors, and neoplasms of gonads; group 11, other malignant epithelial neoplasms and malignant melanomas; group 12, other and unspecified malignant neoplasms. SIR, Standardized incidence ratio. CI, confidence interval.

\* Statistically significant standardized incidence ratio with  $p < 0.05$  assuming a Poisson distribution.

**Supplementary Table 3. Relative risks of the same type of early-onset cancer with the proband among siblings and mothers by ethnic group, 1989 to 2015, California, USA.**

| Cancer of the proband †     | Overall         |                             |                                 | Non-Latino White |                             |                                | Latino all races |                             |                                | p-value ‡        |
|-----------------------------|-----------------|-----------------------------|---------------------------------|------------------|-----------------------------|--------------------------------|------------------|-----------------------------|--------------------------------|------------------|
|                             | No. of Probands | No. of affected relatives § | SIR (95% CI)                    | No. of Probands  | No. of affected relatives § | SIR (95% CI)                   | No. of Probands  | No. of affected relatives § | SIR (95% CI)                   |                  |
| Leukemias                   | 8500            | 11                          | 2.48<br>(0.98, 6.31)            | 1646             | 2                           | 2.19<br>(0.28, 17.02)          | 4374             | 4                           | 1.45<br>(0.45, 4.74)           | 0.083            |
| Lymphomas                   | 2928            | 4                           | 5.90<br>(0.55, 63.82)           | 1060             | 3                           | 9.03<br>(0.3, 270.64)          | 1121             | 0                           | NA                             | NA               |
| CNS tumors                  | 5739            | 11                          | <b>6.19*</b><br>(1.42, 26.93)   | 1728             | 4                           | 5.07<br>(0.56, 46.02)          | 2242             | 3                           | 4.66<br>(0.41, 53.56)          | 0.483            |
| Neuroblastoma               | 1445            | 1                           | 10.28<br>(0.02, 5501.95)        | 367              | 0                           | NA                             | 490              | 0                           | NA                             | NA               |
| Retinoblastoma              | 718             | 10                          | 446.17<br>(0, 216413526.63)     | 126              | 1                           | 194.8<br>(0, 1479721536316.56) | 327              | 7                           | 662.31<br>(0, 126150580638.22) | <b>0.009</b>     |
| Renal tumors                | 1069            | 1                           | 15.95<br>(0.01, 39978.15)       | 209              | 0                           | NA                             | 442              | 1                           | 39.09<br>(0, 8211440.71)       | NA               |
| VII. Hepatic tumors         | 414             | 0                           | NA                              | 74               | 0                           | NA                             | 200              | 0                           | NA                             | NA               |
| VIII. Malignant bone tumors | 249             | 0                           | NA                              | 73               | 0                           | NA                             | 121              | 0                           | NA                             | NA               |
| Sarcomas                    | 2915            | 10                          | 31.49<br>(0.97, 1020.26)        | 816              | 2                           | 18.88<br>(0.05, 7792.14)       | 1259             | 5                           | 35.96<br>(0.19, 6895.34)       | 0.155            |
| GCT                         | 2423            | 3                           | 7.71<br>(0.33, 178.48)          | 672              | 0                           | NA                             | 1270             | 2                           | 8.63<br>(0.15, 506.54)         | NA               |
| Epithelial neoplasms        | 3050            | 24                          | <b>40.68*</b><br>(3.17, 521.78) | 1458             | 9                           | 21.31<br>(1.04, 434.91)        | 1046             | 9                           | 55.65<br>(0.43, 7278.24)       | <b>&lt;0.001</b> |
| Other                       | 255             | 0                           | NA                              | 79               | 0                           | NA                             | 90               | 0                           | NA                             | NA               |
| Hematologic cancers¶        | 11404           | 22                          | <b>2.68*</b><br>(1.35, 5.32)    | 2702             | 6                           | 2.64<br>(0.72, 9.71)           | 5484             | 7                           | 1.56<br>(0.62, 3.94)           | 0.133            |
| Solid cancers¶              | 17849           | 112                         | <b>6.78*</b><br>(4.18, 10.98)   | 5471             | 31                          | <b>4.41*</b><br>(2.10, 9.23)   | 7323             | 50                          | <b>7.94*</b><br>(3.64, 17.34)  | <b>0.005</b>     |

† Cancers were classified into subgroups as defined by the International Classification of Childhood Cancer, Third edition (ICCC-3, November 2012) (<https://seer.cancer.gov/iccc/iccc3.html>).

§ Affected relatives include mother and siblings of the proband diagnosed with early-onset cancer under 26 years of age.

‡ p-value comparing the SIRs between non-Latino White and Latino all races using an approximate Chi-squared test.

¶ Hematologic cancers include group 1, leukemias, myeloproliferative diseases, and myelodysplastic diseases; group 2, lymphomas and reticuloendothelial neoplasms. Solid cancers include group 3, CNS and miscellaneous intracranial and intraspinal neoplasms; group 4, neuroblastoma and other peripheral nervous cell tumors; group 5, retinoblastoma; group 6, renal tumors; group 7, hepatic tumors; group 8, malignant bone tumors; group 9, soft tissue and other extraosseous sarcomas; group 10, germ cell tumors, trophoblastic tumors, and neoplasms of gonads; group 11, other malignant epithelial neoplasms and malignant melanomas; group 12, other and unspecified malignant neoplasms. SIR, Standardized incidence ratio. CI, confidence interval.

\* Statistically significant standardized incidence ratio with  $p < 0.05$  assuming a Poisson distribution.

Supplemental Table 4. Relative risks of any early-onset cancer (diagnosed at 0 to 26 years of age) for siblings and mothers of the same type of cancer with the proband given a proband with cancer by subgroups, 1989 to 2015, California, USA.

| Cancer of the proband <sup>†</sup>                                             | All cancers     |                                        |                                      | The same type of cancer                |                                            |
|--------------------------------------------------------------------------------|-----------------|----------------------------------------|--------------------------------------|----------------------------------------|--------------------------------------------|
|                                                                                | No. of probands | No. of affected relatives <sup>§</sup> | SIR (95% CI)                         | No. of affected relatives <sup>§</sup> | SIR (95% CI)                               |
|                                                                                |                 |                                        | <b>2.70*</b>                         |                                        | 1.86                                       |
| Lymphoid leukemias                                                             | 6705            | 25                                     | <b>(1.60, 4.55)</b>                  | 5                                      | (0.04, 77.51)                              |
| Acute myeloid leukemias                                                        | 1317            | 9                                      | <b>4.61*</b><br><b>(1.44, 14.83)</b> | 3                                      | 26.35<br>(0.21, 3254.81)                   |
| Hodgkin lymphomas                                                              | 1399            | 9                                      | <b>7.12*</b><br><b>(1.67, 30.35)</b> | 2                                      | 10.30<br>(0.03, 3755.90)                   |
| Non-Hodgkin lymphomas (except Burkitt lymphoma)                                | 985             | 5                                      | 4.02<br>(0.81, 20.01)                | 1                                      | 11.35<br>(0.00, 47646.79)                  |
| Ependymomas and choroid plexus tumor                                           | 561             | 2                                      | 2.46<br>(0.42, 14.51)                | 0                                      | NA                                         |
| Astrocytomas                                                                   | 1965            | 11                                     | <b>3.60*</b><br><b>(1.33, 9.71)</b>  | 2                                      | 7.62<br>(0.02, 2780.03)                    |
| Intracranial and intraspinal embryonal tumors                                  | 1010            | 6                                      | 2.67<br>(0.80, 8.96)                 | 1                                      | 11.70<br>(0.00, 49115.47)                  |
| Other gliomas                                                                  | 815             | 8                                      | <b>5.34*</b><br><b>(1.08, 26.52)</b> | 2                                      | 58.00<br>(0.16, 21151.56)                  |
| Other specified intracranial and intraspinal neoplasms                         | 1470            | 5                                      | <b>5.48*</b><br><b>(1.19, 25.27)</b> | 2                                      | 22.91<br>(0.06, 8355.61)                   |
| Neuroblastoma and ganglioneuroblastoma                                         | 1409            | 6                                      | 2.06<br>(0.71, 5.97)                 | 1                                      | 8.95<br>(0.00, 37570.97)                   |
| Nephroblastoma and other nonepithelial renal tumors                            | 1032            | 6                                      | <b>3.67*</b><br><b>(1.05, 12.83)</b> | 1                                      | 16.42<br>(0.00, 68950.65)                  |
| Rhabdomyosarcomas                                                              | 719             | 11                                     | <b>8.46*</b><br><b>(1.84, 38.84)</b> | 0                                      | NA                                         |
| Fibrosarcomas to peripheral nerve sheath tumors to and other fibrous neoplasms | 434             | 7                                      | 10.46<br>(0.95, 114.82)              | 2                                      | <b>390.23*</b><br><b>(1.07, 142319.04)</b> |
| Other specified soft tissue sarcomas                                           | 1624            | 11                                     | <b>7.57*</b><br><b>(2.20, 26.07)</b> | 5                                      | <b>58.45</b><br><b>(1.40, 2438.32)</b>     |
| Malignant gonadal germ cell tumors                                             | 1030            | 12                                     | <b>5.44*</b><br><b>(1.67, 17.71)</b> | 2                                      | 6.69<br>(0.02, 2439.81)                    |
| Malignant melanomas                                                            | 788             | 2                                      | 3.65<br>(0.42, 31.77)                | 1                                      | 22.34<br>(0.01, 93804.63)                  |



|                                         |      |    |                                       |    |                                          |
|-----------------------------------------|------|----|---------------------------------------|----|------------------------------------------|
| <b>Other and unspecified carcinomas</b> | 1845 | 20 | <b>18.12*</b><br><b>(3.85, 85.29)</b> | 17 | <b>115.36*</b><br><b>(15.25, 872.55)</b> |
|-----------------------------------------|------|----|---------------------------------------|----|------------------------------------------|

†Cancers were classified into subgroups as defined by the International Classification of Childhood Cancer, Third edition (ICCC-3, November 2012) (<https://seer.cancer.gov/iccc/iccc3.html>).

§ Affected relatives include mother and siblings of the proband diagnosed with early-onset cancer under 26 years of age.

SIR, Standardized incidence ratio. CI, confidence interval.

\* Statistically significant standardized incidence ratio with  $p < 0.05$  assuming a Poisson distribution.

Supplementary Table 5. Relative risks of all pediatric cancers (diagnosed 0 to 15 years of age) among siblings and mothers by ethnic group, 1989 to 2015, California, USA.

| Cancer of the proband †            | Overall         |                             |                               | Non-Latino White |                             |                         | Latino all races |                             |                                 | p-value ‡    |
|------------------------------------|-----------------|-----------------------------|-------------------------------|------------------|-----------------------------|-------------------------|------------------|-----------------------------|---------------------------------|--------------|
|                                    | No. of Probands | No. of affected relatives § | SIR (95% CI)                  | No. of Probands  | No. of affected relatives § | SIR (95% CI)            | No. of Probands  | No. of affected relatives § | SIR (95% CI)                    |              |
| <b>Overall</b>                     | 29072           | 72                          | <b>1.56*</b><br>(1.17, 2.08)  | 8119             | 18                          | 0.93<br>(0.60, 1.46)    | 12736            | 35                          | <b>1.51*</b><br>(1.00, 2.26)    | <b>0.003</b> |
| <b>Leukemias</b>                   | 8500            | 22                          | 1.40<br>(0.85, 2.29)          | 1646             | 2                           | 0.38<br>(0.16, 0.90)    | 4374             | 11                          | 1.23<br>(0.64, 2.37)            | <b>0.003</b> |
| <b>Lymphomas</b>                   | 2928            | 11                          | <b>2.88*</b><br>(1.06, 7.86)  | 1060             | 4                           | 2.15<br>(0.51, 9.08)    | 1121             | 4                           | 2.04<br>(0.50, 8.28)            | 0.916        |
| <b>CNS tumors</b>                  | 5739            | 23                          | <b>2.42*</b><br>(1.28, 4.57)  | 1728             | 7                           | 1.53<br>(0.61, 3.83)    | 2242             | 5                           | 1.19<br>(0.46, 3.09)            | 0.359        |
| <b>Neuroblastoma</b>               | 1445            | 5                           | 1.57<br>(0.52, 4.70)          | 367              | 0                           | NA                      | 490              | 1                           | 0.85<br>(0.14, 5.16)            | 0.313        |
| <b>Retinoblastoma</b>              | 718             | 11                          | <b>6.79*</b><br>(1.46, 31.64) | 126              | 1                           | 1.81<br>(0.13, 25.25)   | 327              | 8                           | <b>10.95*</b><br>(1.11, 108.43) | <b>0.011</b> |
| <b>Renal tumors</b>                | 1069            | 4                           | 1.81<br>(0.48, 6.77)          | 209              | 0                           | NA                      | 442              | 3                           | 2.91<br>(0.42, 20.03)           | 0.077        |
| <b>VII. Hepatic tumors</b>         | 414             | 1                           | 1.20<br>(0.14, 10.2)          | 74               | 0                           | NA                      | 200              | 0                           | NA                              | NA           |
| <b>VIII. Malignant bone tumors</b> | 249             | 1                           | 3.28<br>(0.09, 114.19)        | 73               | 0                           | NA                      | 121              | 1                           | 6.06<br>(0.05, 755.63)          | 0.306        |
| <b>Sarcomas</b>                    | 2915            | 23                          | <b>5.25*</b><br>(2.06, 13.41) | 816              | 4                           | 2.15<br>(0.51, 9.04)    | 1259             | 11                          | <b>4.96*</b><br>(1.33, 18.52)   | <b>0.031</b> |
| <b>GCT</b>                         | 2423            | 13                          | <b>4.70</b><br>(1.45, 15.29)  | 672              | 3                           | 2.57<br>(0.42, 15.72)   | 1270             | 7                           | 4.33<br>(0.93, 20.25)           | 0.098        |
| <b>Epithelial neoplasms</b>        | 3050            | 13                          | <b>5.83*</b><br>(1.57, 21.67) | 1458             | 6                           | 3.67<br>(0.79, 16.98)   | 1046             | 5                           | 5.03<br>(0.70, 35.87)           | 0.165        |
| <b>Other</b>                       | 255             | 3                           | 8.03<br>(0.33, 198.63)        | 79               | 2                           | 10.49<br>(0.12, 932.36) | 90               | 1                           | 5.86<br>(0.05, 673.74)          | 0.313        |
| <b>Hematologic cancers¶</b>        | 11404           | 29                          | 1.48<br>(0.95, 2.31)          | 2702             | 6                           | 0.85<br>(0.41, 1.76)    | 5484             | 13                          | 1.19<br>(0.66, 2.16)            | <b>0.023</b> |
| <b>Solid cancers¶</b>              | 17849           | 71                          | <b>2.64*</b><br>(1.81, 3.86)  | 5471             | 18                          | 1.46<br>(0.84, 2.56)    | 7323             | 32                          | <b>2.57*</b><br>(1.47, 4.47)    | <b>0.013</b> |

† Cancers were classified into subgroups as defined by the International Classification of Childhood Cancer, Third edition (ICCC-3, November 2012) (<https://seer.cancer.gov/iccc/iccc3.html>).

§ Affected relatives include mother and siblings of the proband diagnosed with early-onset cancer under 26 years of age.

‡ p-value comparing the SIRs between non-Latino White and Latino all races using an approximate Chi-squared test.

¶ Hematologic cancers include group 1, leukemias, myeloproliferative diseases, and myelodysplastic diseases; group 2, lymphomas and reticuloendothelial neoplasms. Solid cancers include I group 3, CNS and miscellaneous intracranial and intraspinal neoplasms; group 4, neuroblastoma and other peripheral nervous cell tumors; group 5, retinoblastoma; group 6, renal tumors; group 7, hepatic tumors; group 8, malignant bone tumors; group 9, soft tissue and other extraosseous sarcomas; group 10, germ cell tumors, trophoblastic tumors, and neoplasms of gonads; group 11, other malignant epithelial neoplasms and malignant melanomas; group 12, other and unspecified malignant neoplasms. SIR, Standardized incidence ratio. CI, confidence interval.

\* Statistically significant standardized incidence ratio with  $p < 0.05$  assuming a Poisson distribution.

**Supplemental Table 6. Relative risks of second primary malignancies of the same type of early-onset cancer (diagnosed 0 to 26 years of age) with the first primary malignancy by ethnic groups, California, USA.**

| Cancer of the proband †                | Overall     |             |                          | Non-Latino White |             |                      | Latino (all races) |             |                      | p-value ‡    |
|----------------------------------------|-------------|-------------|--------------------------|------------------|-------------|----------------------|--------------------|-------------|----------------------|--------------|
|                                        | No. of FPMs | No. of SPMs | SIR (95% CI)             | No. of FPMs      | No. of SPMs | SIR (95% CI)         | No. of FPMs        | No. of SPMs | SIR (95% CI)         |              |
|                                        |             |             | 9.27*                    |                  |             | 12.05                |                    |             | 5.82                 |              |
| <b>Leukemias</b>                       | 8,543       | 41          | <b>(3.65 to 23.56)</b>   | 1,649            | 11          | (1.55 to 93.71)      | 4,385              | 16          | (1.78 to 18.96)      | <b>0.001</b> |
|                                        |             |             | 13.27*                   |                  |             | 12.05                |                    |             | 11.29                |              |
| <b>Lymphomas</b>                       | 2,960       | 9           | <b>(1.23 to 143.48)</b>  | 1,063            | 4           | (0.40 to 361.60)     | 1,124              | 3           | (0.25 to 505.82)     |              |
|                                        |             |             | 16.39*                   |                  |             | 15.19                |                    |             | 17.08                |              |
| <b>CNS tumors</b>                      | 5,877       | 29          | <b>(3.76 to 71.56)</b>   | 1,765            | 12          | (1.67 to 137.80)     | 2,277              | 11          | (1.49 to 196.43)     | 0.431        |
|                                        |             |             | 20.62                    |                  |             | 51.28                |                    |             |                      |              |
| <b>Neuroblastoma</b>                   | 1,450       | 2           | (0.04 to 11151.98)       | 369              | 2           | (0.00 to 1047532.66) | 491                | 0           | NA                   |              |
| <b>Retinoblastoma</b>                  | 728         | 0           |                          | 127              | 0           | NA                   | 334                | 0           | NA                   |              |
| <b>Renal tumors</b>                    | 1,078       | 0           |                          | 209              | 0           | NA                   | 444                | 0           | NA                   |              |
| <b>VII. Hepatic tumors</b>             | 417         | 0           |                          | 74               | 0           | NA                   | 200                | 0           | NA                   |              |
| <b>VIII. Malignant bone tumors</b>     | 250         | 0           |                          | 73               | 0           | NA                   | 121                | 0           | NA                   |              |
|                                        |             |             | 50.31*                   |                  |             | 47.17                |                    |             | 50.36                |              |
| <b>Sarcomas</b>                        | 3,028       | 16          | <b>(1.56 to 1626.19)</b> | 850              | 5           | (0.11 to 19415.87)   | 1,297              | 7           | (0.26 to 9665.53)    | 0.353        |
|                                        |             |             | 5.14                     |                  |             |                      |                    |             | 8.62                 |              |
| <b>GCT</b>                             | 2,468       | 2           | (0.22 to 119.09)         | 679              | 0           | NA                   | 1,287              | 2           | (0.15 to 504.41)     |              |
| <b>Epithelial neoplasms</b>            | 3,479       | 10          | <b>(1.32 to 217.44)</b>  | 1,489            | 6           | (0.70 to 288.80)     | 1,057              | 4           | (0.19 to 3216.7)     | <b>0.005</b> |
| <b>Other</b>                           | 261         | 0           |                          | 79               | 0           | NA                   | 90                 | 0           | NA                   |              |
| <b>Hematologic cancers<sup>¶</sup></b> | 11,553      | 50          | <b>(3.08, 12.10)</b>     | 2,727            | 15          | <b>(1.80, 24.29)</b> | 5,528              | 19          | <b>(1.68, 10.68)</b> | <b>0.012</b> |
|                                        |             |             | 1.82*                    |                  |             | 1.85                 |                    |             | 2.06                 |              |
| <b>Solid cancers<sup>¶</sup></b>       | 18,893      | 30          | <b>(1.12, 2.94)</b>      | 5,673            | 13          | (0.88, 3.87)         | 7,551              | 13          | (0.95, 4.51)         | 0.681        |

SIR, Standardized incidence ratio. CI, confidence interval. FPM, first primary malignancy. SPM, second primary malignancy.

† Cancers were classified into subgroups as defined by the International Classification of Childhood Cancer, Third edition (ICCC-3, November 2012) (<https://seer.cancer.gov/iccc/iccc3.html>).

‡ p-value comparing the SIRs between non-Latino White and Latino all races using an approximate Chi-squared test.

¶ Hematologic cancers include group 1, leukemias, myeloproliferative diseases, and myelodysplastic diseases; group 2, lymphomas and reticuloendothelial neoplasms. Solid cancers include I group 3, CNS and miscellaneous intracranial and intraspinal neoplasms; group 4, neuroblastoma and other peripheral nervous cell tumors; group 5, retinoblastoma; group 6, renal tumors; group 7, hepatic tumors; group 8, malignant bone tumors; group 9, soft tissue and other extraosseous sarcomas; group 10, germ cell tumors, trophoblastic tumors, and neoplasms of gonads; group 11, other malignant epithelial neoplasms and malignant melanomas; group 12, other and unspecified malignant neoplasms. SIR, Standardized incidence ratio. CI, confidence interval. FPM, first primary malignancy. SPM, second primary malignancy.  
\* Statistically significant standardized incidence ratio with  $p < 0.05$  assuming a Poisson distribution.

### **Supplemental Figure legends**

#### **Supplemental Figure 1. Relative risks of all cancers for mothers given a proband with cancer.**

A. Relative risks of all cancers for mothers given a proband with cancer by 5-year age group.

B. Age-adjusted incidence rate of all cancers by ethnic group in SEER 13.

AAIR in SEER 13, age-adjusted incidence rate of all cancers among females derived from the Surveillance, Epidemiology, and End Results (SEER) Program version 13 among female patients diagnosed in California between 1992 to 2015.

The axis for SIR was natural log-transformed. The error bars represent natural log-transformed upper and lower confidence limits of the SIR. Age (years) represent the age of first primary cancer diagnosis for a mother.

The SIR was 5.89 (95% CI: 4.25 to 8.16) for all mother cases age 15-39; 17.56 (95% CI: 6.24 to 49.42) for non-Latino White mother cases age 15-39; 5.19 (95% CI: 3.24 to 8.31) for Latino mother cases age 15-39.

\* P-value < 0.001 comparing the SIR of age 15-39 for non-Latino White to Latino subjects using an approximate Chi-square test.

Abbreviations: SIR, Standardized incidence ratio. AAIR: age-adjusted incidence rate. SEER 13, Surveillance, Epidemiology, and End Results Program version 13.

Supplementary Figure 1A.

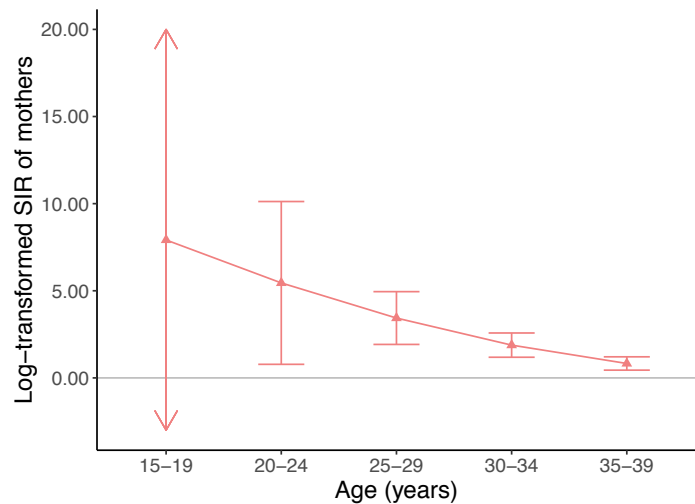

Supplementary Figure 1B.

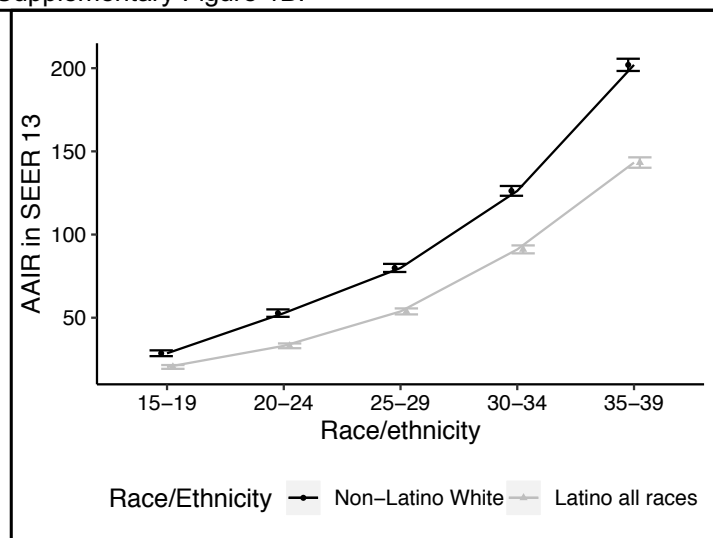

Supplement: Supplementary file [file media-1.pdf]
